# Supplementary material for: Anti-Leukemic Effects on a U937 Cell Line of Fresh and Steamed Chinese Kale Juice and Their Pro-Apoptotic Effects via a Caspase-Dependent Pathway
Source: Foods. 2023 Mar 30;12(7):1471. doi: 10.3390/foods12071471 (PMC10094306; doi:10.3390/foods12071471)
Supplement: Supplementary file 1 [file foods-12-01471-s001.zip › foods-2222171-supplementary.pdf]

## Anti-Leukemic Effects on a U937 Cell Line of Fresh and Steamed Chinese Kale Juice and Their Pro-Apoptotic Effects via a Caspase-Dependent Pathway

Siriphorn Pungpuag <sup>1</sup>, Somchai Boonpangrak <sup>2</sup> and Yaneenart Suwanwong <sup>3,\*</sup>

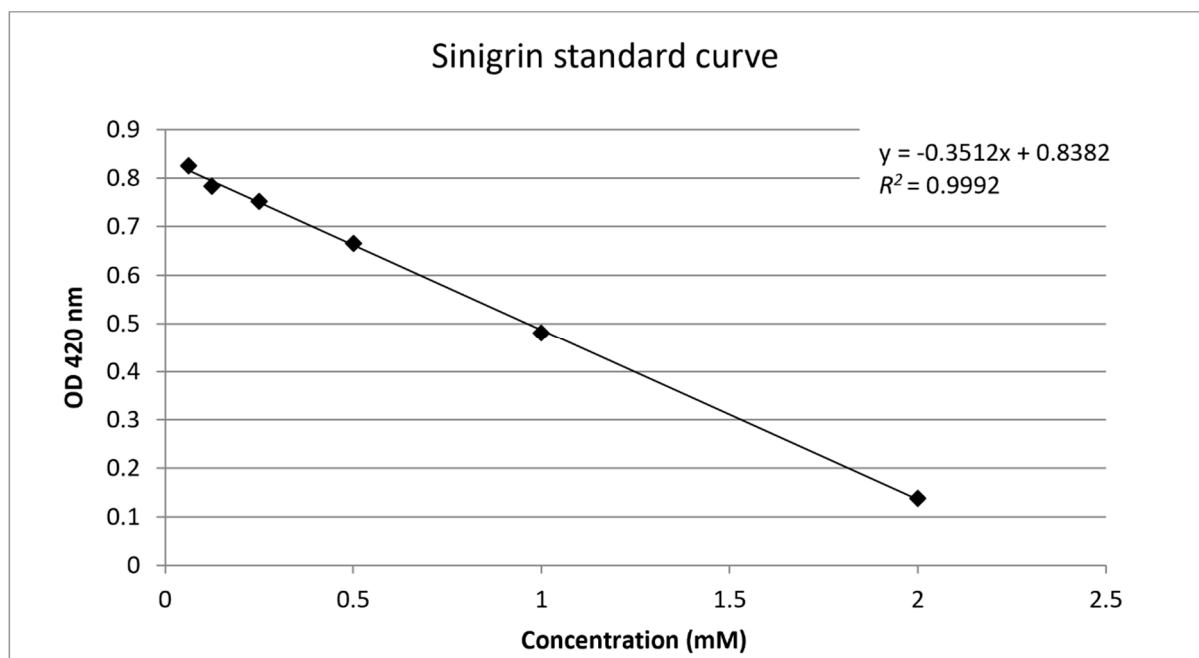

Supplementary Figure S1. Standard curve of sinigrin

A: Standard (1,3-benzodithiol-2-thione): 5  $\mu$ g/mL

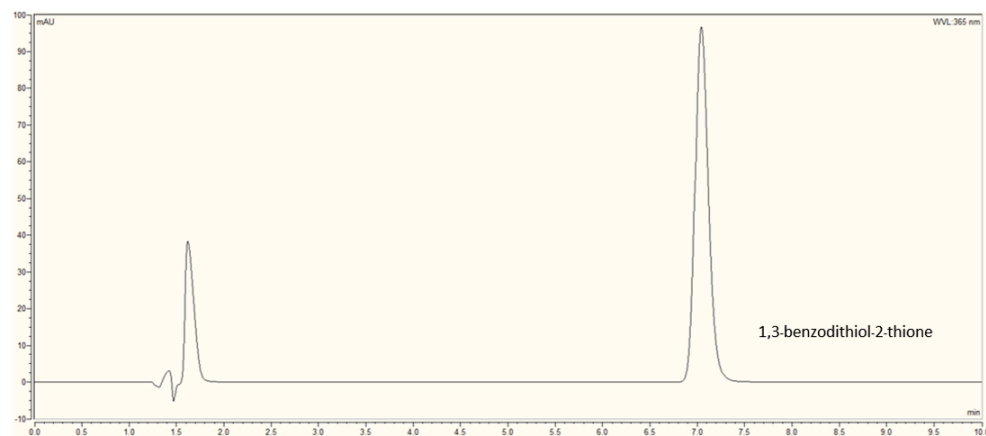

B: 1,3-benzodithiol-2-thione of fresh Chinese kale

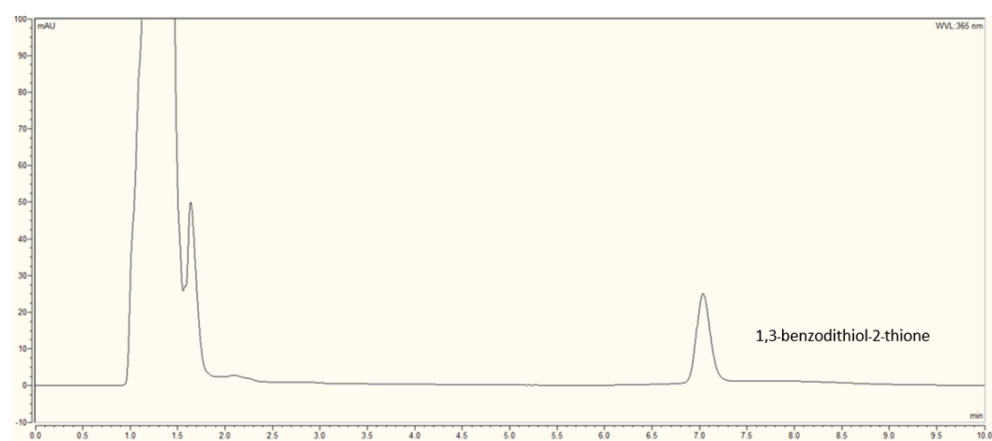

C: 1,3-benzodithiol-2-thione of steamed Chinese kale

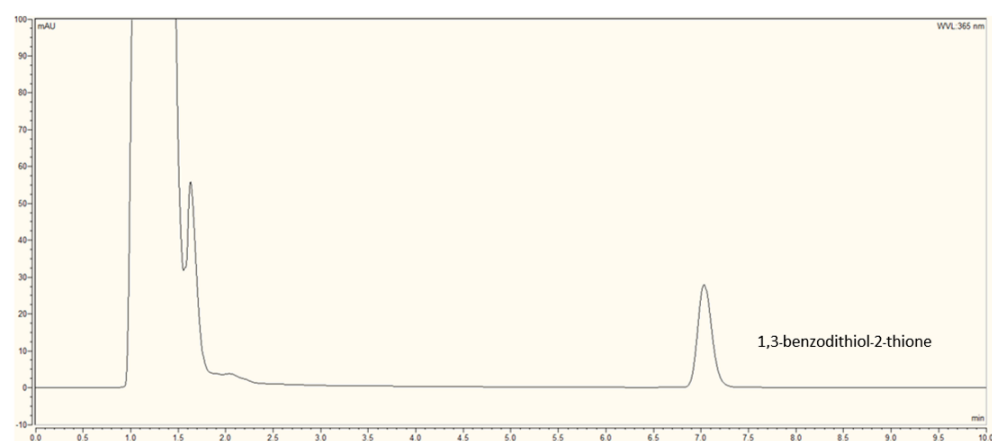

**Supplementary Figure S2.** HPLC chromatogram of 1,3-benzodithiol-2-thione of both standard and Chinese kale juice samples.

## Control

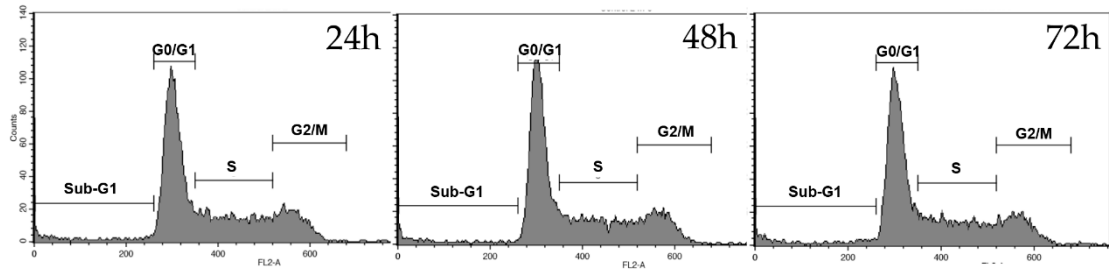

## 0.625% *v/v* Fresh CKJ

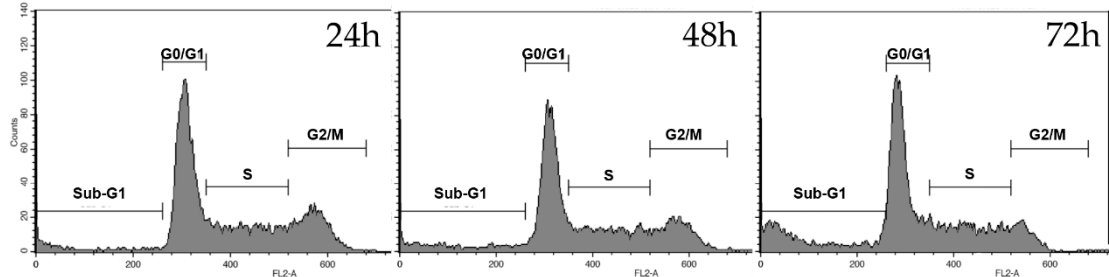

## 1.25% *v/v* Fresh CKJ

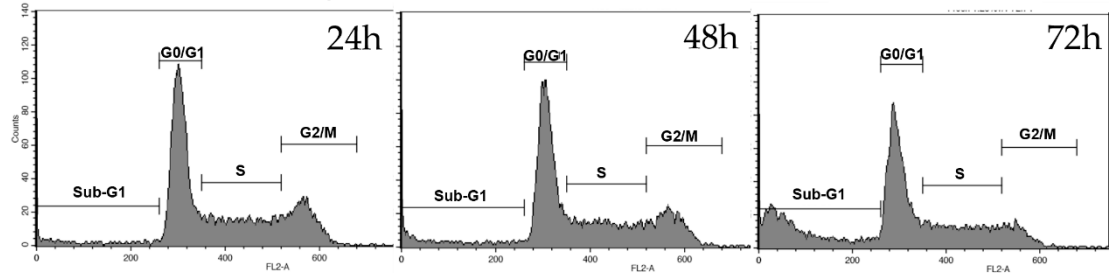

## 2.5% *v/v* Fresh CKJ

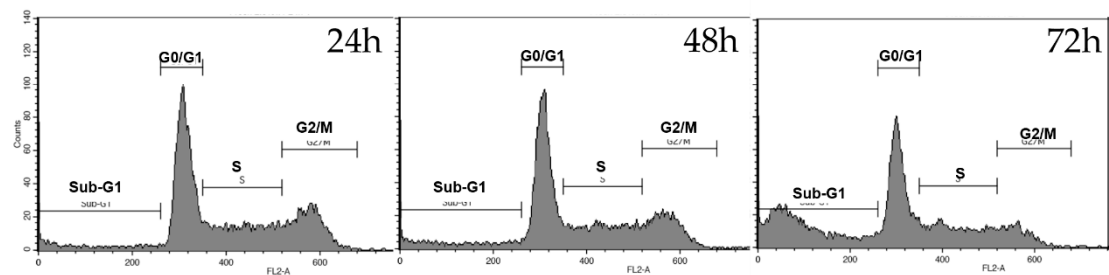

## 5% *v/v* Fresh CKJ

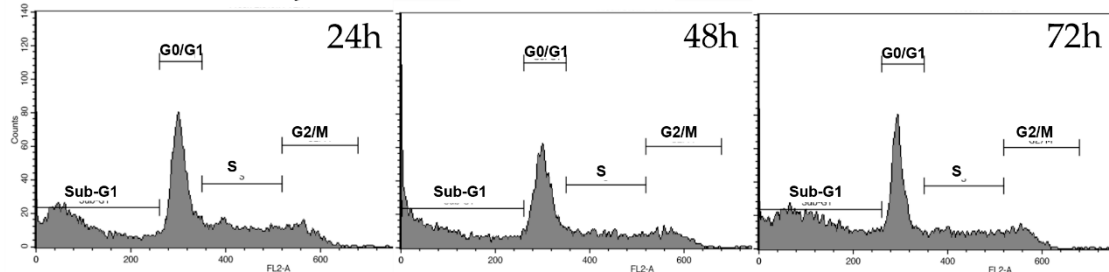

PI

## Control

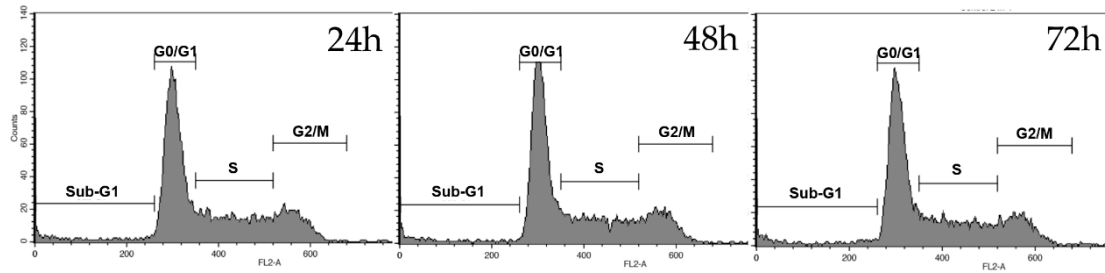

## 0.625% *v/v* Steamed CKJ

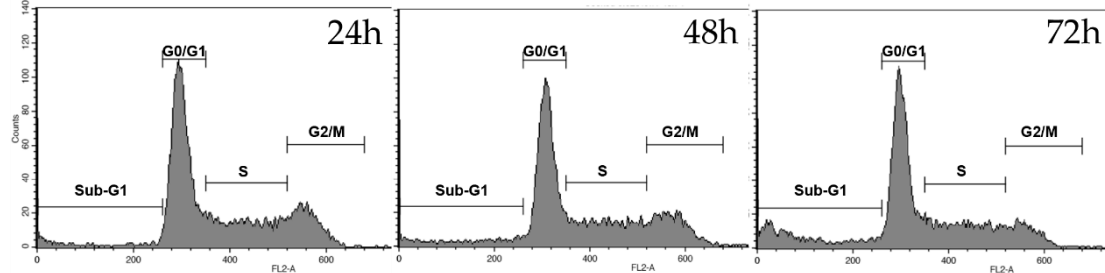

## 1.25% *v/v* Steamed CKJ

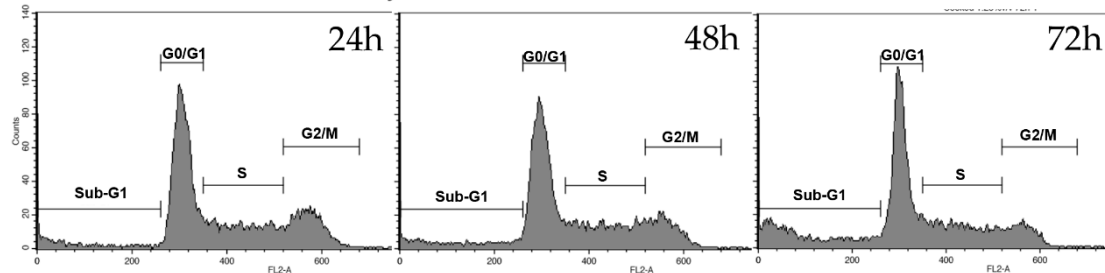

## 2.5% *v/v* Steamed CKJ

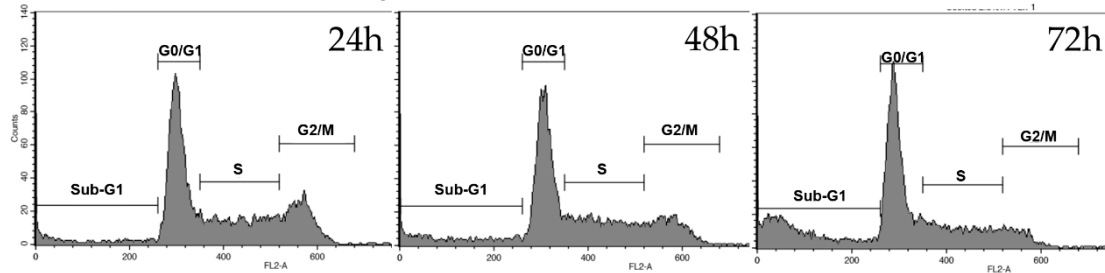

## 5% *v/v* Steamed CKJ

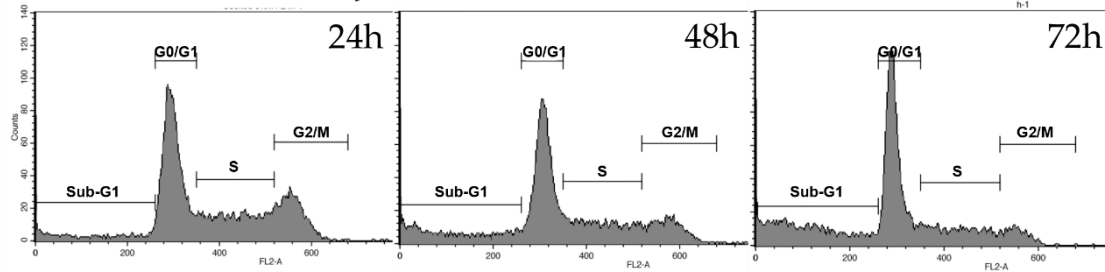

PI

**Supplementary Figure S3.** Representative flow cytometry histograms of cell cycle analysis of U937 cells after incubation with control (normal saline), fresh CKJ and steamed CKJ at different concentrations (0.625, 1.25, 2.5 and 5% *v/v*) for 24, 48 and 72 h.

## Control

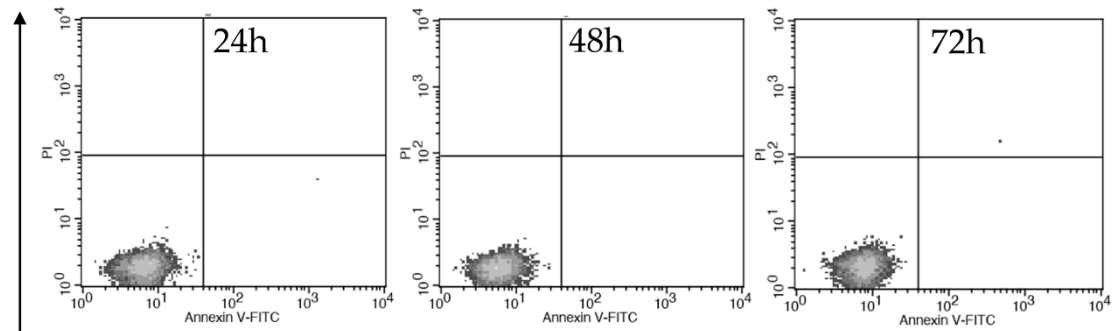

## 1.25% *v/v* Fresh CKJ

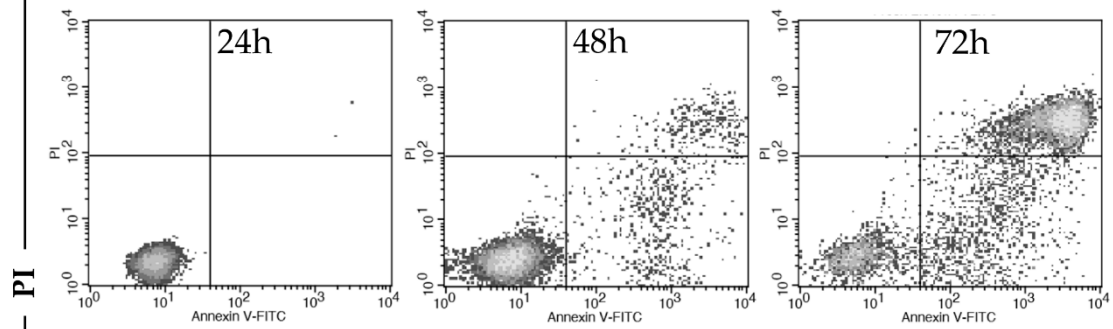

## 5% *v/v* Fresh CKJ

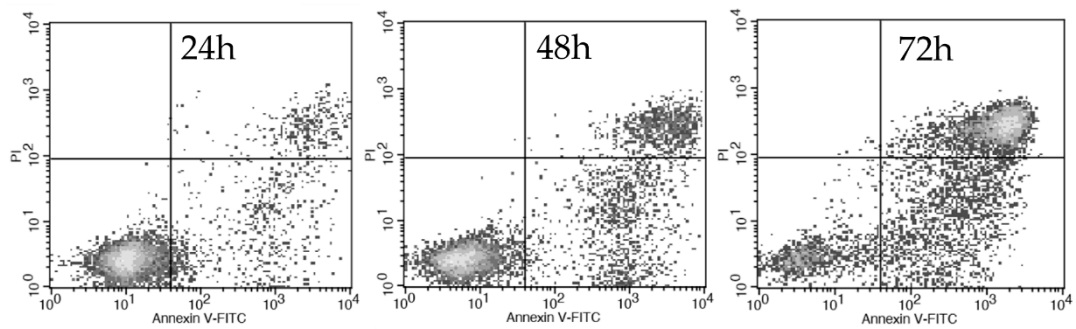

## 20% *v/v* Fresh CKJ

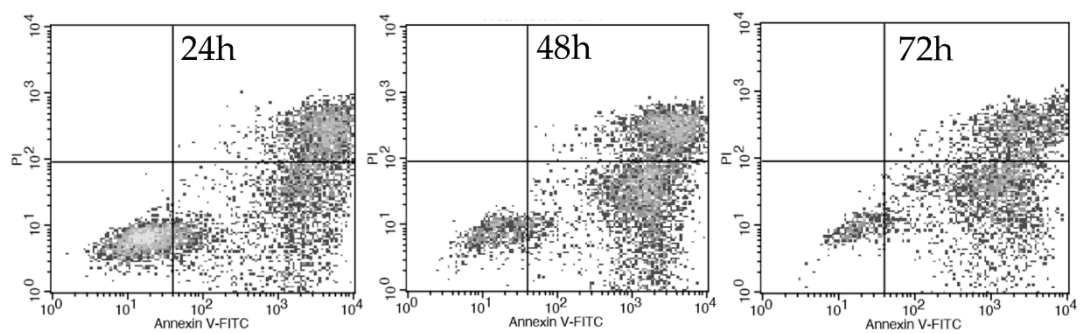

Annexin V-FITC

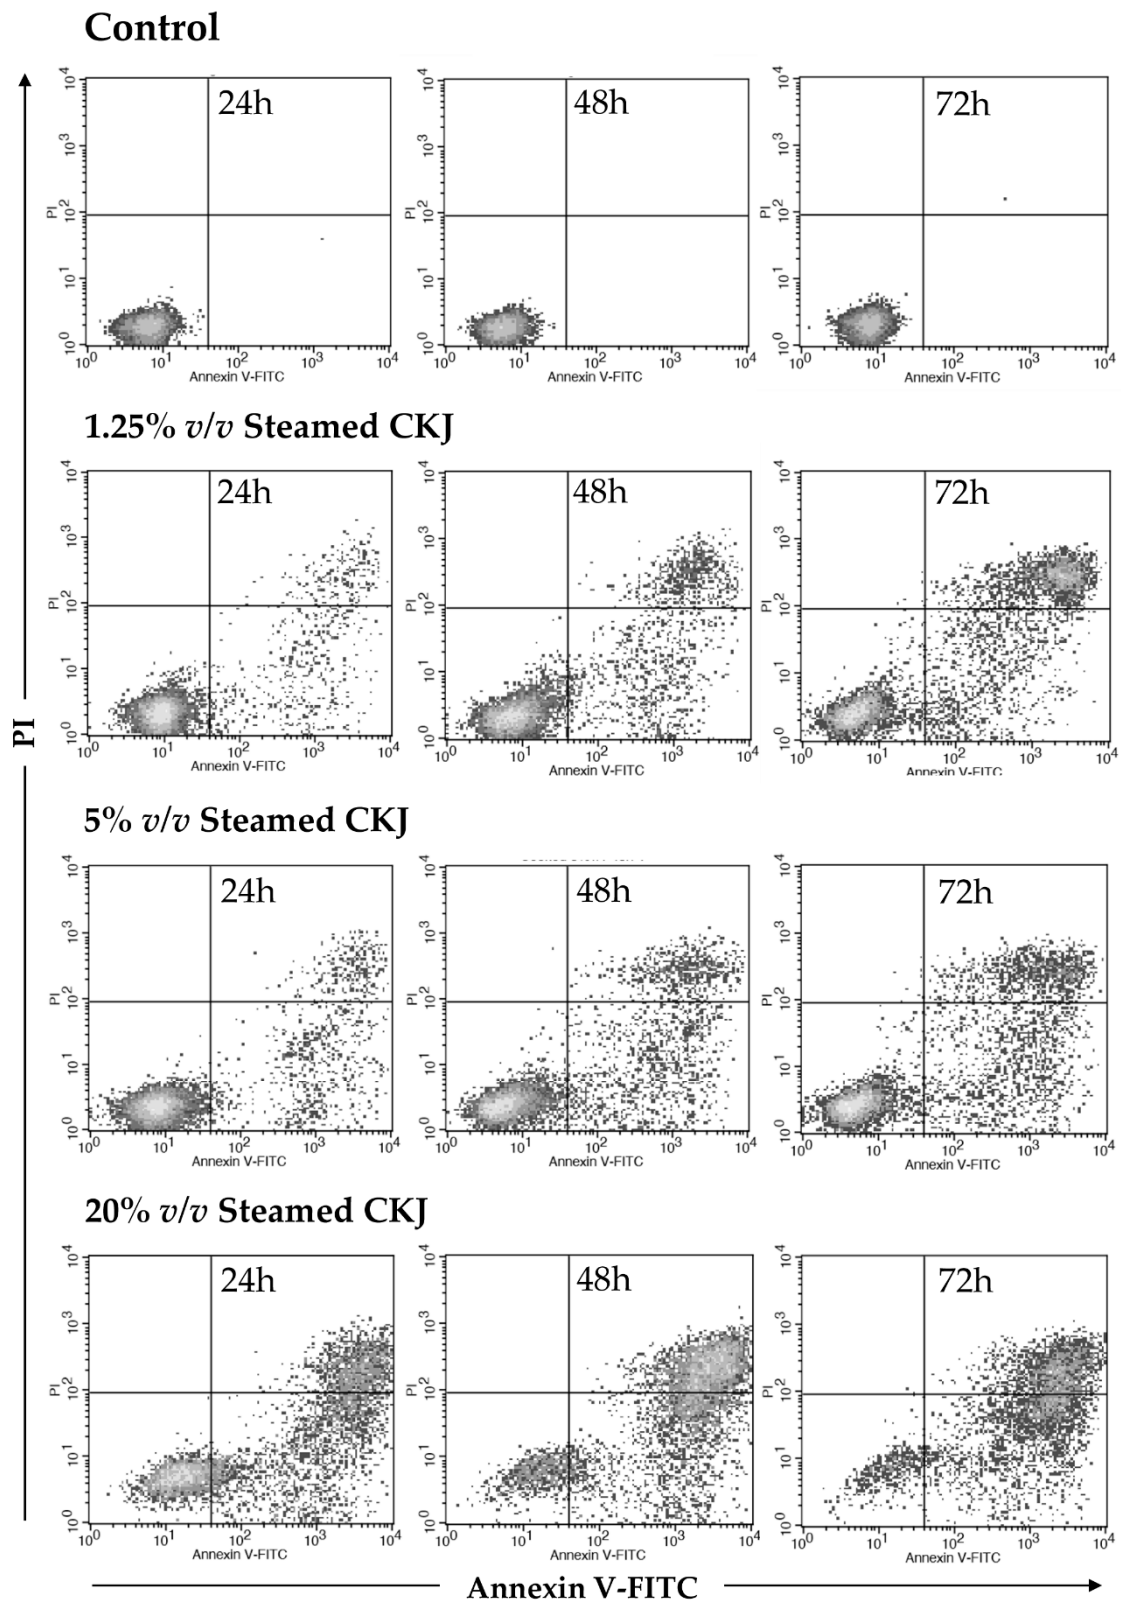

**Supplementary Figure S4.** Representative flow cytometry histograms of apoptosis analysis of U937 cells after incubation with control (normal saline), fresh CKJ and steamed CKJ at different concentrations (1.25, 5 and 20% *v/v*) for 24, 48 and 72 h.

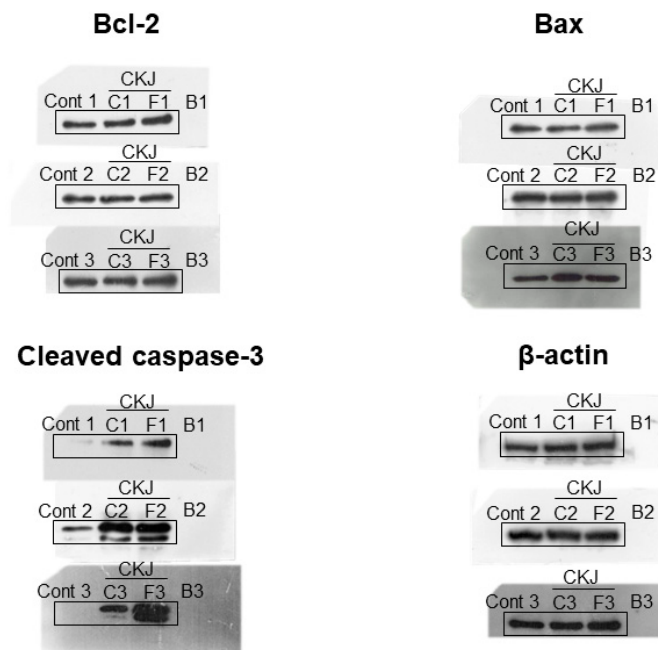

**Supplementary Figure S5.** Uncropped image of Western blots for Figure 4. Lanes showed U937 cells were treated with normal saline (Cont), steamed CKJ (C), fresh CKJ (F) and blank (B) of three independent experiments.

**Supplementary Table S1.** Antibody lists.

| Antibody            | Catalog No. | Source                    |
|---------------------|-------------|---------------------------|
| Bcl-2               | #4223       | Cell Signaling Technology |
| Bax                 | #2772       | Cell Signaling Technology |
| Cleaved caspase-3   | #9664       | Cell Signaling Technology |
| β-Actin             | #4970       | Cell Signaling Technology |
| Anti-rabbit IgG HRP | #7074       | Cell Signaling Technology |
